# Supplementary material for: Synthesis of alkyl polyglycosides using SO3H-functionalized ionic liquids as catalysts
Source: Royal Society of Chemistry journal article supplement (doi:10.1039/d1ra00337b), 2021-01-01
Supplement: d1ra00337b1.pdf [file d1ra00337b1.pdf]

# Synthesis of alkyl polyglycosides using SO<sub>3</sub>H-functionalized ionic liquids as catalysts

*Wenliang Wu<sup>ab</sup>, Hongshuai Gao<sup>\*ab</sup>, Bin Hai<sup>b</sup>, Binqi Wang<sup>b</sup>, Min Yu<sup>b</sup> and Yi Nie<sup>\*ab</sup>*

<sup>a</sup>Beijing Key Laboratory of Ionic Liquids Clean Process, CAS Key Laboratory of Green Process

and Engineering, State Key Laboratory of Multiphase Complex System, Institute of Process

Engineering, Chinese Academy of Sciences, 100190, Beijing, China

<sup>b</sup>Zhengzhou Institute of Emerging Industrial Technology, 450046, Zhengzhou, China

---

\*Corresponding author. Tel./fax: +86-010-82544875.

E-mail addresses: [hsgao@ipe.ac.cn](mailto:hsgao@ipe.ac.cn) (H. S. Gao); [ynie@ipe.ac.cn](mailto:ynie@ipe.ac.cn) (Y. Nie)

1.  $^1\text{H}$  NMR spectra were recorded on a Bruker spectrometer (600 MHz) in deuterium oxide ( $\text{D}_2\text{O}$ ). The results of four SFILs are as follows:

[PSmim] $\text{HSO}_4$ :

$^1\text{H}$  NMR(600 MHz,  $\text{D}_2\text{O}$ ):  $\delta$  ppm= 2.29(m, 2H), 2.89(t, 2H), 3.86(s, 3H), 4.32(t, 2H), 7.41(s, 1H), 7.48(s, 1H), 8.70(s, 1H)

[PSmim][pTSA]:

$^1\text{H}$  NMR(600 MHz,  $\text{D}_2\text{O}$ ):  $\delta$  ppm= 2.30(m, 2H), 2.37(s, 3H), 2.89(t, 2H), 3.85(s, 3H), 4.31(t, 2H), 7.34(d, 2H), 7.40(s, 1H), 7.47(s, 1H), 7.67(d, 2H), 8.68(s, 1H)

[PSPy] $\text{HSO}_4$ :

$^1\text{H}$  NMR(600 MHz,  $\text{D}_2\text{O}$ ):  $\delta$  ppm= 2.36(m, 2H), 2.86(t, 2H), 4.65(t, 2H), 8.00(s, 2H), 8.47(s, 1H), 8.76(d, 2H)

[PSPy][pTSA]:

$^1\text{H}$  NMR(600 MHz,  $\text{D}_2\text{O}$ ):  $\delta$  ppm= 2.41(s, 3H), 2.49(m, 2H), 2.99(t, 2H), 7.37(d, 2H), 7.70(d, 2H), 8.10(t, 2H), 8.57(t, 1H), 8.90(d, 2H)

2. The Fourier transform infrared-spectra (FTIR) were obtained in the range of 400-4000  $\text{cm}^{-1}$  on a Thermo Nicolet 380 spectrometer. The results of four SFILs are as follows:

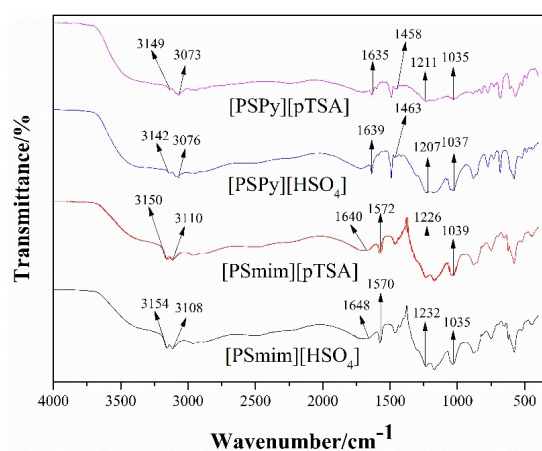

**Figure S1** The FT-IR spectrum of four SFILs

3. Electrospray ionization mass spectrometry (ESI-MS) were obtained in both positive and negative modes with a Bruker micrOTOF-Q II.

[PSmim] $\text{HSO}_4$

The molecular weight (MW) of  $[\text{PSmim}]^+$  theoretical value is 205.2438, cationic mode detection value is 205.0710,  $\text{HSO}_4^-$  theoretical value is 97.0705, anion mode detection value is 96.9614, indicating that the MW difference of the theoretical value and the actual detection value of  $[\text{PSmim}]\text{HSO}_4$  is very small. It proved that the synthesized ionic liquid (IL) is the target product, and the results of ESI-MS are presented on Figure S2 and S3.

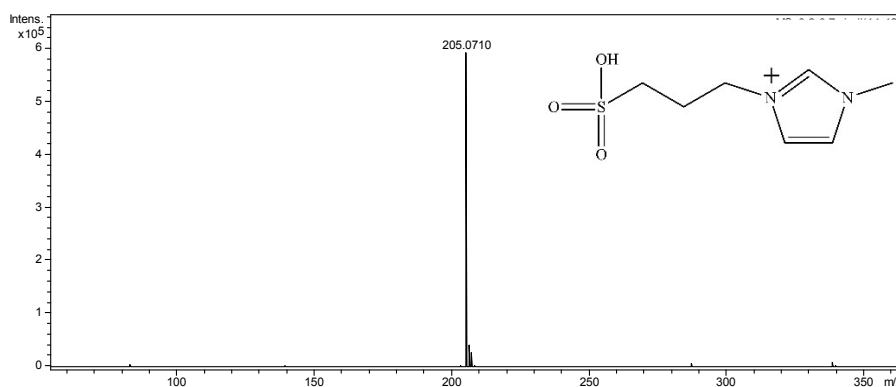

**Figure S2** The ESI-MS cationic model of [PSmim]HSO<sub>4</sub>

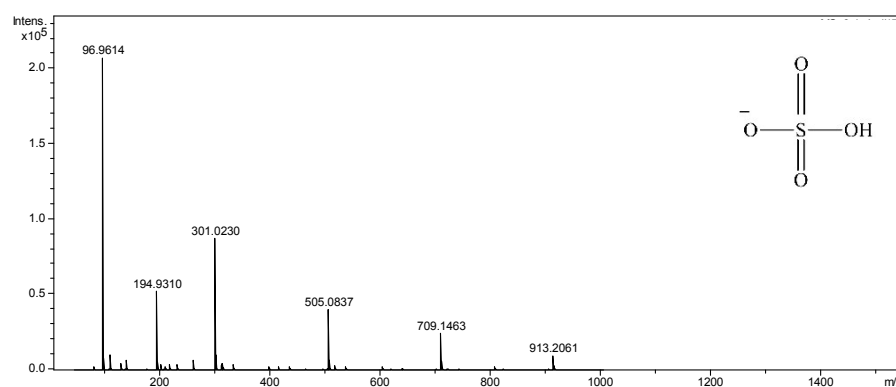

**Figure S3** The ESI-MS anionic model of [PSmim]HSO<sub>4</sub>

### [PSmim][pTSA]

The MW of [PSmim]<sup>+</sup> theoretical value is 205.2438, cationic mode detection value is 205.0638, [pTSA]<sup>-</sup> theoretical value is 171.1888, anion mode detection value is 171.0172, indicating that the MW difference of the theoretical value and the actual detection value of [PSmim][pTSA] is very small. It proved that the synthesized IL is the target product, and the results of ESI-MS are presented on Figure S4 and S5.

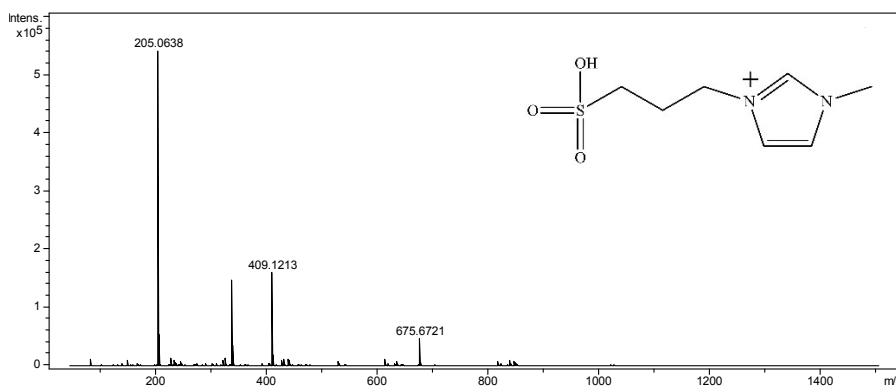

**Figure S4** The ESI-MS cationic model of [PSmim][pTSA]

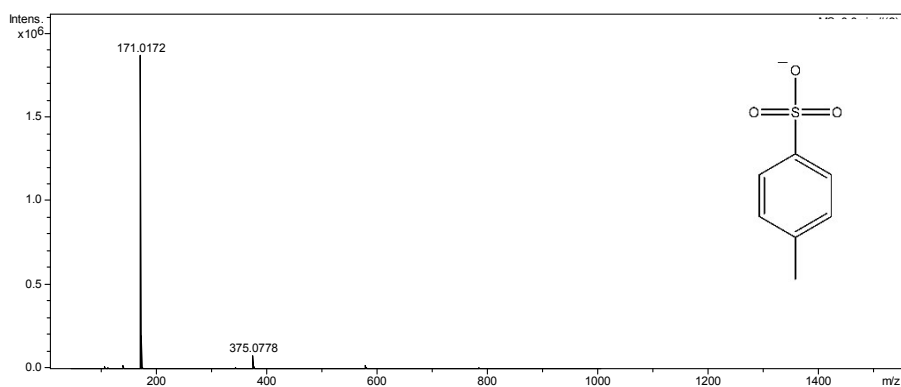

**Figure S5** The ESI-MS anionic model of [PSmim][pTSA]

[PSPy]HSO<sub>4</sub>

The MW of [PSPy]<sup>+</sup> theoretical value is 202.2422, cationic mode detection value is 202.0566, HSO<sub>4</sub><sup>-</sup> theoretical value is 97.0705, anion mode detection value is 96.9623, indicating that the MW difference of the theoretical value and the actual detection value of [PSPy]HSO<sub>4</sub> is very small. It proved that the synthesized IL is the target product, and the results of ESI-MS are presented on Figure S6 and S7.

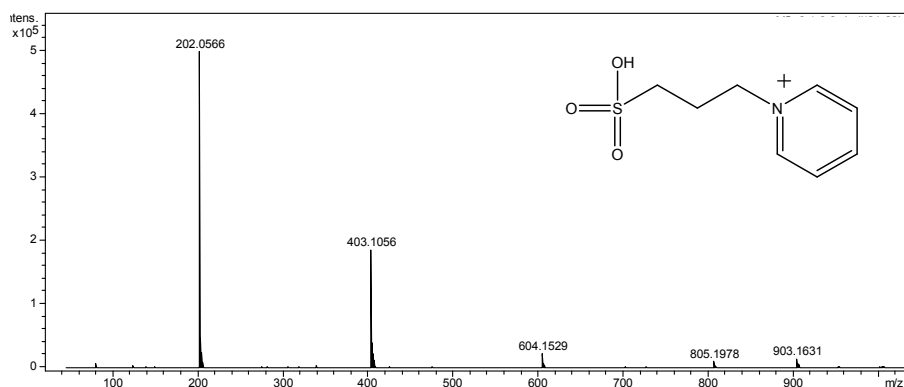

**Figure S6** The ESI-MS cationic model of [PSPy]HSO<sub>4</sub>

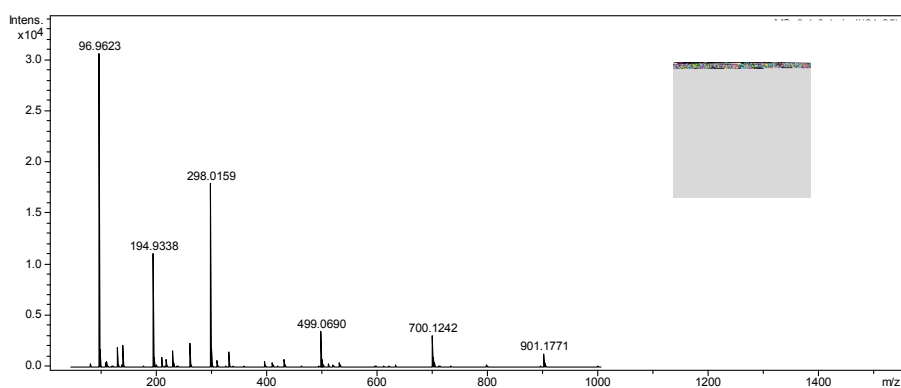

**Figure S7** The ESI-MS anionic model of [PSPy]HSO<sub>4</sub>

[PSPy][pTSA]

The MW of [PSPy]<sup>+</sup> theoretical value is 202.2422, cationic mode detection value is 202.0537, [pTSA]<sup>-</sup> theoretical value is 171.1888, anion mode detection value is 171.0119, indicating that the MW difference of the theoretical value and the actual detection value of [PSPy][pTSA] is very small. It proved that the synthesized IL is the target product, and the results of ESI-MS are presented on Figure S8 and S9.

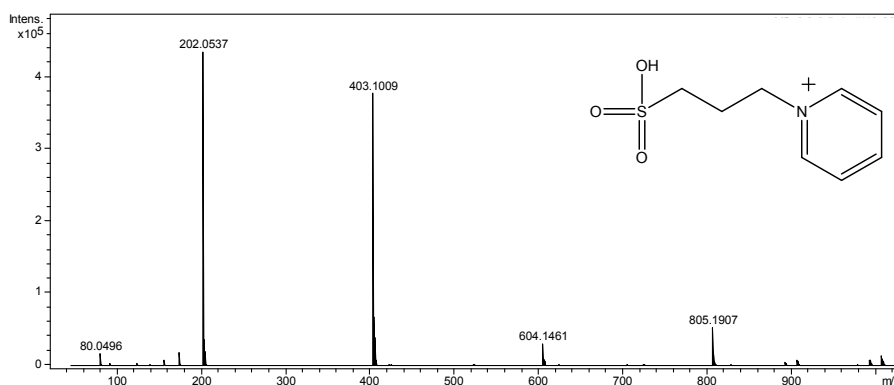

**Figure S8** The ESI-MS cationic model of [PSPy][pTSA]

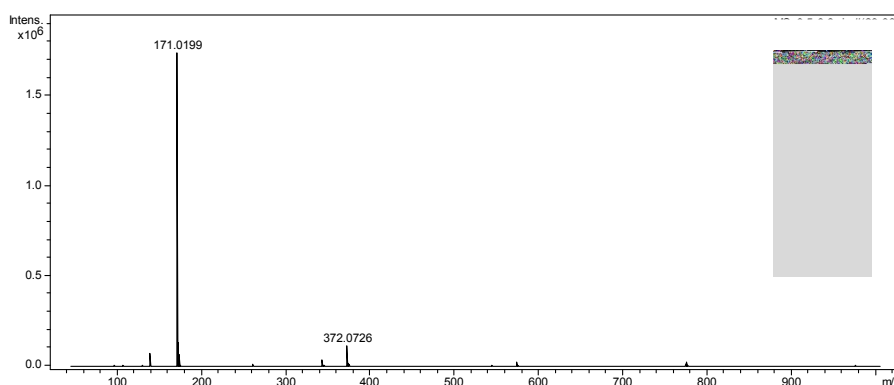

**Figure S9** The ESI-MS anionic model of [PSPy][pTSA]

4. The decomposition temperature of four SFILs are measured by thermal gravimetric analyzer (TGA Q500 V3.15 Build 263) by heating samples from 298.15 K to 873.15 K at a heating rate 10 K/min with N<sub>2</sub> atmosphere at a flow of 25 mL/min. The TGA results exhibit the decomposition temperature are over 523 K of four SFILs, indicating four SFILs have well thermal stability, and the TGA results are displayed on Figure S10.

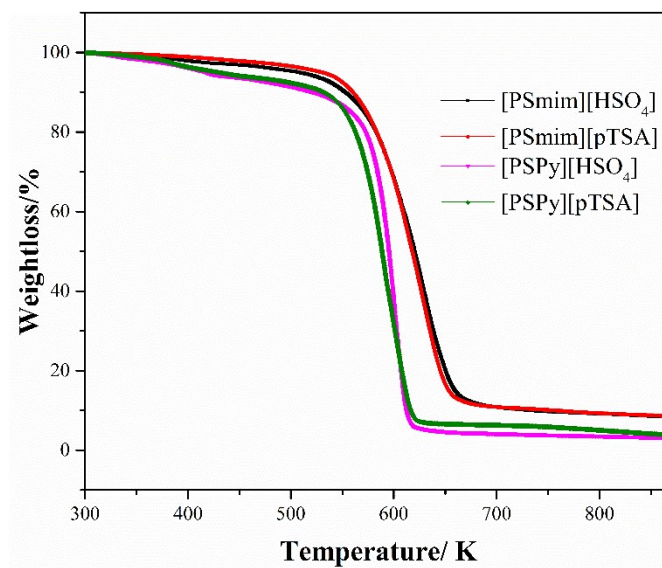

**Figure S10** The thermogravimetric trace of four SFILs
